# Supplementary material
Source: PubMed Central journal article supplement (PMC8826526)
Supplement: djab071_supplementary_data.pdf [file djab071_supplementary_data.pdf]

## Supplementary Material

Wang L, Paller C, Hong H, De Felice A, Brawley O, Alexander GC. Comparison of treatments for nonmetastatic castration-resistant prostate cancer: A matching adjusted indirect comparison and network meta-analysis

### Supplementary Methods

#### Search Strategies

##### MEDLINE (PubMed interface)

|     |                                                                                                                                                                                                                                                                                                                                       |
|-----|---------------------------------------------------------------------------------------------------------------------------------------------------------------------------------------------------------------------------------------------------------------------------------------------------------------------------------------|
| #1  | "Prostatic Neoplasms"[Mesh] OR (("Prostate"[Mesh] OR prostate*[tw] OR prostatic*[tw]) AND ("Neoplasms"[Mesh] OR neoplasm*[tiab] OR cancer[tw] OR cancers*[tw] OR cancerous*[tw] OR tumor*[tw] OR tumour*[tw]))                                                                                                                        |
| #2  | "MDV 3100" [Supplementary Concept] OR MDV3100[tw] OR Enzalutamide[tw] OR "MDV-3100"[tw] OR xtandi[tw] OR "915087-33-1"[rn]                                                                                                                                                                                                            |
| #3  | "apalutamide" [Supplementary Concept] OR apalutamide[tw] OR "ARN-509"[tw] OR arn509[tw] OR erleada[tw] OR "956104-40-8"[rn]                                                                                                                                                                                                           |
| #4  | "abiraterone" [Supplementary Concept] OR abiraterone[tw] OR "CB-7598"[tw] OR CB7598[tw] OR "154229-19-3"[rn]                                                                                                                                                                                                                          |
| #5  | "darolutamide" [Supplementary Concept] OR darolutamide[tw] OR "ORM-16497"[tw] OR "ORM-16555"[tw] OR "ODM-201"[tw] OR odm201[tw] OR "bay 1841788"[tw] OR "bay1841788"[tw] OR "1297538-32-9"[rn]                                                                                                                                        |
| #6  | "Docetaxel"[Mesh] OR Docetaxel[tw] OR Docetaxol[tw] OR "Taxoltere Metro"[tw] OR "RP 56976"[tw] OR RP56976[tw] OR Taxotere[tw] OR "NSC 628503"[tw] OR nsc628503[tw] OR Daxotel[rn] OR dexotel[tw] OR docefrez[tw] OR "lit 976"[tw] OR "lit976"[tw] OR oncodocel[tw] OR taxespira[tw] OR taxoter[tw] OR textot[tw] OR "114977-28-5"[rn] |
| #7  | #2 OR #3 OR #4 OR #5 OR #6                                                                                                                                                                                                                                                                                                            |
| #8  | ("Hormones"[Mesh] OR hormon*[tw] OR "Castration"[Mesh] OR castrat*[tw] OR androgen*[tw])                                                                                                                                                                                                                                              |
| #9  | #1 AND #7 AND #8                                                                                                                                                                                                                                                                                                                      |
| #10 | ((randomized controlled trial[pt]) OR (controlled clinical trial[pt]) OR (randomised[tiab] OR randomized[tiab]) OR (placebo[tiab]) OR (drug therapy[sh]) OR (randomly[tiab]) OR (trial[tiab]) OR (groups[tiab])) NOT (animals[mh] NOT humans[mh])                                                                                     |
| #11 | #9 AND #10                                                                                                                                                                                                                                                                                                                            |

##### EMBASE (OVID interface)

|     |                                                                                                                                                                                                                                                                                                                           |
|-----|---------------------------------------------------------------------------------------------------------------------------------------------------------------------------------------------------------------------------------------------------------------------------------------------------------------------------|
| #1  | 'prostate tumor'/exp OR ('prostate'/exp AND 'neoplasm'/exp OR ((prostate* OR prostatic*) NEAR/3 (neoplasm* OR cancer OR cancers* OR cancerous* OR tumor* OR tumour*)):ab,ti,kw,tn                                                                                                                                         |
| #2  | 'enzalutamide'/exp OR (Enzalutamide OR "MDV-3100" OR xtandi OR "915087-33-1"):ab,ti,kw,tn                                                                                                                                                                                                                                 |
| #3  | 'apalutamide'/exp OR (apalutamide OR "ARN-509" OR arn509 OR erleada OR "956104-40-8"):ab,ti,kw,tn                                                                                                                                                                                                                         |
| #4  | 'abiraterone'/exp OR (abiraterone OR "CB-7598" OR CB7598 OR "154229-19-3"):ab,ti,kw,tn                                                                                                                                                                                                                                    |
| #5  | 'darolutamide'/exp OR (darolutamide OR "ORM-16497" OR "ORM-16555" OR "ODM-201" OR odm201 OR "bay 1841788" OR "bay1841788" OR "1297538-32-9"):ab,ti,kw,tn                                                                                                                                                                  |
| #6  | 'docetaxel'/exp OR (Docetaxel OR Docetaxol OR "Taxoltere Metro" OR "RP 56976" OR RP56976 OR Taxotere OR "NSC 628503" OR nsc628503 OR Daxotel OR dexotel OR docefrez OR "lit 976" OR "lit976" OR oncodocel OR taxespira OR taxoter OR textot OR "114977-28-5"):ab,ti,kw,tn                                                 |
| #7  | #2 OR #3 OR #4 OR #5 OR #6                                                                                                                                                                                                                                                                                                |
| #8  | 'hormone'/exp OR 'castration'/exp OR (hormon* OR castrat* OR androgen*):ab,ti,kw                                                                                                                                                                                                                                          |
| #9  | #1 AND #7 AND #8                                                                                                                                                                                                                                                                                                          |
| #10 | 'crossover procedure':de OR 'double-blind procedure':de OR 'randomized controlled trial':de OR 'single-blind procedure':de OR 'drug therapy'/lnk OR (random* OR factorial* OR crossover* OR cross NEXT/1 over* OR placebo* OR doubl* NEAR/1 blind* OR singl* NEAR/1 blind* OR assign* OR allocat* OR volunteer*):de,ab,ti |
| #11 | #9 AND #10                                                                                                                                                                                                                                                                                                                |
| #12 | ('animal'/exp OR 'animal experiment'/exp) NOT 'human'/exp                                                                                                                                                                                                                                                                 |
| #13 | #11 NOT #12                                                                                                                                                                                                                                                                                                               |

## Cochrane Central Register of Controlled Trials (CENTRAL, Wiley interface)

|     |                                                                                                                                                                                                                                            |
|-----|--------------------------------------------------------------------------------------------------------------------------------------------------------------------------------------------------------------------------------------------|
| #1  | MeSH descriptor: [Prostatic Neoplasms] explode all trees                                                                                                                                                                                   |
| #2  | ((prostate* OR prostatic*) NEAR/3 (neoplasm* OR cancer OR cancers* OR cancerous* OR tumor* OR tumour*))                                                                                                                                    |
| #3  | #1 OR #2                                                                                                                                                                                                                                   |
| #4  | (Enzalutamide OR "MDV-3100" OR xtandi OR "915087-33-1")                                                                                                                                                                                    |
| #5  | (apalutamide OR "ARN-509" OR arn509 OR erleada OR "956104-40-8")                                                                                                                                                                           |
| #6  | (abiraterone OR "CB-7598" OR CB7598 OR "154229-19-3")                                                                                                                                                                                      |
| #7  | (darolutamide OR "ORM-16497" OR "ORM-16555" OR "ODM-201" OR odm201 OR "bay 1841788" OR "bay1841788" OR "1297538-32-9")                                                                                                                     |
| #8  | MeSH descriptor: [Docetaxel] explode all trees                                                                                                                                                                                             |
| #9  | (Docetaxel OR Docetaxol OR "Taxoltere Metro" OR "RP 56976" OR RP56976 OR Taxotere OR "NSC 628503" OR nsc628503 OR Daxotel OR dexotel OR docefrez OR "lit 976" OR "lit976" OR oncodocel OR taxespira OR taxoter OR textot OR "114977-28-5") |
| #10 | #4 OR #5 OR #6 OR #7 OR #8 OR #9                                                                                                                                                                                                           |
| #11 | MeSH descriptor: [Hormones] explode all trees                                                                                                                                                                                              |
| #12 | MeSH descriptor: [Castration] explode all trees                                                                                                                                                                                            |
| #13 | (hormon* OR castrat* OR androgen*)                                                                                                                                                                                                         |
| #14 | #11 OR #12 OR #13                                                                                                                                                                                                                          |
| #15 | #3 AND #10 AND #14 in Trials                                                                                                                                                                                                               |

## ClinicalTrials.gov

[https://clinicaltrials.gov/ct2/results/refine?show\\_xprt=Y](https://clinicaltrials.gov/ct2/results/refine?show_xprt=Y)

(Prostatic Neoplasms) AND (Enzalutamide OR "MDV-3100" OR xtandi OR "915087-33-1" OR apalutamide OR "ARN-509" OR arn509 OR erleada OR "956104-40-8" OR abiraterone OR "CB-7598" OR CB7598 OR "154229-19-3" OR darolutamide OR "ORM-16497" OR "ORM-16555" OR "ODM-201" OR odm201 OR "bay 1841788" OR "bay1841788" OR "1297538-32-9" OR Docetaxel OR Docetaxol OR "Taxoltere Metro" OR "RP 56976" OR RP56976 OR Taxotere OR "NSC 628503" OR nsc628503 OR Daxotel OR dexotel OR docefrez OR "lit 976" OR "lit976" OR oncodocel OR taxespira OR taxoter OR textot OR "114977-28-5") AND (Hormone OR Castration OR androgen)

Filter with Study type "Interventional (Clinical Trial)" and Sex "Male"

## EU Clinical Trials Register

<https://www.clinicaltrialsregister.eu/ctr-search/search>

(Prostatic Neoplasms) AND (Enzalutamide OR "MDV-3100" OR xtandi OR "915087-33-1" OR apalutamide OR "ARN-509" OR arn509 OR erleada OR "956104-40-8" OR abiraterone OR "CB-7598" OR CB7598 OR "154229-19-3" OR darolutamide OR "ORM-16497" OR "ORM-16555" OR "ODM-201" OR odm201 OR "bay 1841788" OR "bay1841788" OR "1297538-32-9" OR Docetaxel OR Docetaxol OR "Taxoltere Metro" OR "RP 56976" OR RP56976 OR Taxotere OR "NSC 628503" OR nsc628503 OR Daxotel OR dexotel OR docefrez OR "lit 976" OR "lit976" OR oncodocel OR taxespira OR taxoter OR textot OR "114977-28-5") AND (Hormone OR Castration OR androgen)

## United States Food and Drug Administration (US FDA) and European Medicines Agency (EMA)

US FDA: <https://www.accessdata.fda.gov/scripts/cder/daf/>

EMA: <https://www.ema.europa.eu/en/medicines>

#1 Enzalutamide, #2 Apalutamide, #3 Abiraterone, #4 Darolutamide, #5 Docetaxel

## Matching-Adjusted Direct Comparison Methods and Results

### Methods

Matching-adjusted indirect comparison (MAIC) is a form of propensity score weighting, applicable where individual patient data (IPD) are available one trial and aggregate data (AD) in another.<sup>1</sup> Individuals in the IPD trial are weighted by the inverse of their propensity scores, to balance the baseline characteristics with that of the AD trial.<sup>1</sup>

1. If treatment  $t$  in the IPD trial were received by the AD trial population, the mean outcome  $Y_{t_{IPD}(AD)}$  is estimated by taking the weighted average of the outcomes  $Y_{t_{IPD}(IPD)}$  of the  $N_{t_{IPD}(IPD)}$  individuals in treatment  $t$  arm of the IPD trial population

$$\hat{Y}_{t_{IPD}(AD)} = \frac{\sum_{i=1}^{N_{t_{IPD}(IPD)}} Y_{t_{IPD}(IPD)} * W_{it_{IPD}}}{\sum_{i=1}^{N_{t_{IPD}(IPD)}} W_{it_{IPD}}}$$

2. The weight  $w_{it_{IPD}}$  assigned to the  $i$ -th individual receiving treatment  $t$  in the IPD trial is equal to the odds of being enrolled in the AD trial vs. the IPD trial. The weights are estimated using logistic regression

$$\log(w_{it_{IPD}}) = \alpha_0 + \alpha_1^T * X_{it_{IPD}}$$

Where  $X_{it_{IPD}}$  is the covariate vector for the  $i$ -th individual receiving treatment  $t$  in the IPD trial. The regression parameters  $\hat{\alpha}_1$  were estimated using the method of moments proposed by Signorovitch et al.,<sup>2</sup> so that the weights exactly balance the mean covariates values between the weighted IPD trial population and AD trial population. When the mean covariate values of the AD trial  $\bar{X}_{(AD)} = 0$ , Signorovitch et al. show that it is equivalent to minimizing  $\sum_t \sum_{i=1}^{N_{t_{IPD}}} \exp(\alpha_1^T * X_{it_{IPD}})$ . Then

$$\hat{Y}_{t_{IPD}(AD)} = \frac{\sum_{i=1}^{N_{t_{IPD}}} Y_{t_{IPD}(IPD)} * \exp(\alpha_1^T * X_{it_{IPD}})}{\sum_{i=1}^{N_{t_{IPD}}} \exp(\alpha_1^T * X_{it_{IPD}})}$$

3. The indirect comparison between IPD trial treatment and AD trial treatment is estimated using

$$\hat{\Delta}_{t_{IPD}-t_{AD}} = g(\hat{Y}_{t_{IPD}(AD)}) - g(\hat{Y}_{t_{AD}(AD)})$$

where  $g(y)$  is the appropriate link function for relative treatment effects: log link for the hazard of metastasis or death and logit link for the probability of serious adverse events. We weighted Cox regression and logistic regression to estimate the hazard ratio of metastasis or death and odds ratio of serious adverse events, respectively, from indirect comparison. The estimated hazard ratio/odds ratio were then fed into network meta-analysis models. For parametric survival network meta-analysis, the weighted Kaplan Meier estimates, i.e., the weighted events and risk sets at time intervals, of the IPD trial were fed into the models.

4. The standard error for MAIC estimates is calculated using the robust sandwich estimator<sup>2</sup> to account for uncertainties in estimated weights.
5. The effective sample size (ESS) of the pseudo-population is estimated by

$$ESS = \frac{\left( \sum_t \sum_{i=1}^{N_{t_{IPD}}} \hat{w}_{it_{IPD}} \right)^2}{\sum_t \sum_{i=1}^{N_{t_{IPD}}} \hat{w}_{it_{IPD}}^2}$$

As the relative treatment effects are estimated by weighting the IPD trial population, ESS is the number of independent, non-weighted individuals that would be required to provide an estimate with the same prediction as the weighted estimate.<sup>1</sup>

### Results

1. Distribution of rescaled weights.

|       | Min  | 1 <sup>st</sup> quartile | Median | Mean | 3 <sup>rd</sup> quartile | Max  |
|-------|------|--------------------------|--------|------|--------------------------|------|
| Value | 0.01 | 0.57                     | 0.77   | 1.00 | 1.21                     | 5.54 |

The rescaled weight is calculated as

$$\tilde{W} = \frac{\hat{W}_{it_{IPD}}}{\sum_{i=1}^{N_{t_{IPD}}} \hat{W}_{it_{IPD}}} * N_{t_{IPD}}$$

Rescaled weights are relative to the original unit weights of each individual; a rescaled weight >1 indicates that an individual carries more weight in the pseudo population than in IPD trial population, and a rescaled weight <1 indicates that an individual carries less weight.

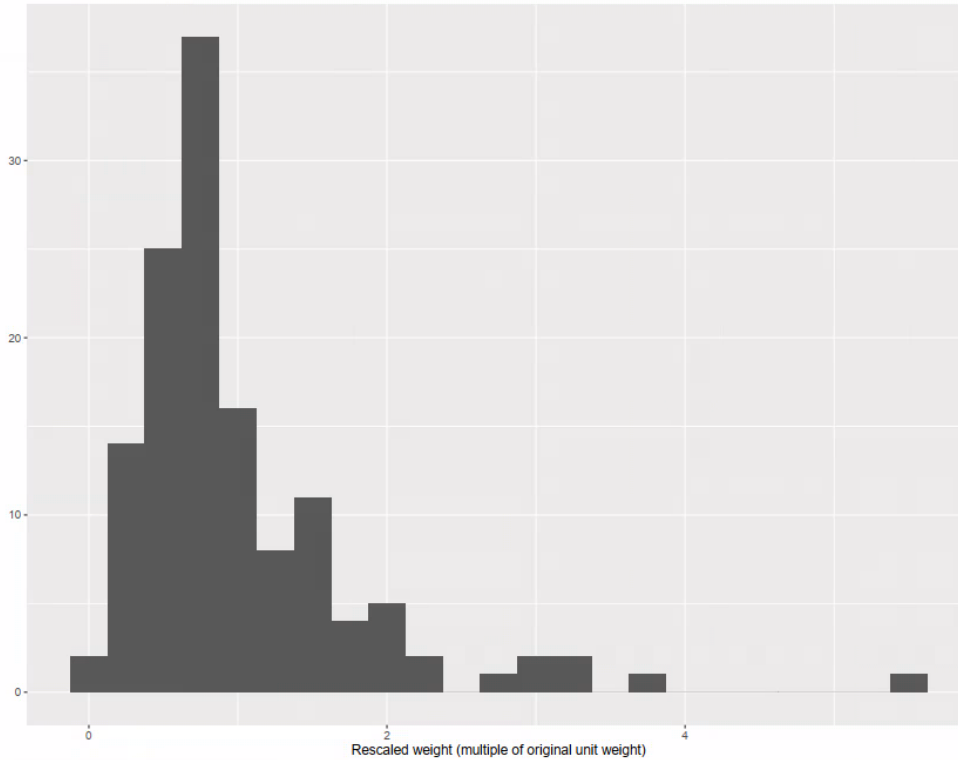

2. The estimated ESS is 81.
3. The mean covariate values before and after weighting

|                          |  | Age group (%) |       |       |       |      | ECOG performance status (%) |      | PSA (mean) | Prior prostatectomy or radiation therapy (%) |      |
|--------------------------|--|---------------|-------|-------|-------|------|-----------------------------|------|------------|----------------------------------------------|------|
|                          |  | <65           | 65-69 | 70-74 | 75-84 | >=85 | 0                           | 1    |            | Yes                                          | No   |
| IMAAGEN before weighting |  | 16.8          | 22.9  | 30.5  | 22.1  | 7.6  | 85.5                        | 14.5 | 21.1       | 89.3                                         | 10.7 |
| IMAAGEN after weighting  |  | 12.3          | 17.8  | 21.6  | 39.8  | 8.5  | 77.4                        | 22.6 | 15.2       | 76.6                                         | 23.4 |
| SPARTAN                  |  | 12.3          | 17.8  | 21.6  | 39.8  | 8.5  | 77.4                        | 22.6 | 15.2       | 76.6                                         | 23.4 |

**Supplementary Table 1. Data Items Extracted**

| Category                       | Data items                                                                                                                                                                                                                                                                                                                                                                             |
|--------------------------------|----------------------------------------------------------------------------------------------------------------------------------------------------------------------------------------------------------------------------------------------------------------------------------------------------------------------------------------------------------------------------------------|
| Trial design                   | Randomized controlled trials/single-arm trials, countries and centers, eligibility criteria, randomization (ratio and stratification), allocation concealment, masking, sponsor, median duration of follow-up                                                                                                                                                                          |
| Trial arms                     | Drug name, dosage, frequency                                                                                                                                                                                                                                                                                                                                                           |
| Reported outcomes <sup>a</sup> | Primary outcomes, secondary outcomes, safety outcomes                                                                                                                                                                                                                                                                                                                                  |
| Baseline data                  | Patient characteristics: age, Eastern Cooperative Oncology Group performance status score, serum prostate-specific antigen level, and other baseline characteristics reported<br><br>Information extracted: number of participants randomized, mean (standard deviation) and (or) median (range/interquartile range) for continuous variables and number (%) for categorical variables |
| Efficacy outcomes              | Primary outcome of interest: Metastasis-free survival<br><br>Secondary outcome of interest: overall survival<br><br>Information extracted: number of patients who had the event, median follow-up time, median survival, hazard ratio (95% confidence interval), and Kaplan-Meier curves                                                                                               |
| Safety outcomes                | Proportions of patients who experienced any serious adverse event<br><br>Proportions of patients who experienced any grade 3 or 4 adverse event<br><br>Information extracted: number of patients included in the safety analysis, median follow-up time, and number of patients who had the event                                                                                      |

<sup>a</sup>Definitions of outcomes: 1) Metastasis-free survival: time from randomization to radiographic evidence of metastasis or death from any cause, whichever occurs first. 2) Overall survival: time from randomization to death from any cause. 3) Serious adverse event: an untoward medical occurrence associated with the use of a drug and results in any of the following outcomes: death, a life-threatening adverse event, inpatient hospitalization or prolongation of existing hospitalization, a persistent or significant incapacity or substantial disruption of the ability to conduct normal life functions, or a congenital anomaly/birth defect.<sup>3</sup> 4) Grade 3 or 4 adverse event: any unfavorable and unintended sign (including an abnormal laboratory finding), symptom, or disease temporally associated with the use of a medical treatment or procedure that has a severity of: grade 3, severe or medically significant but not immediately life-threatening; hospitalization or prolongation of hospitalization indicated; disabling; limiting self-care activities of daily living; or grade 4, life-threatening consequences; urgent intervention indicated.<sup>4</sup>

**Supplementary Table 2. Efficacy Outcomes Assessed in Included Trials<sup>a</sup>**

| <b>Trial ID</b> | <b>Outcome</b>                                               | <b>Outcome definition</b>                                                                                                                                                                                                                                                                                                                                                   |
|-----------------|--------------------------------------------------------------|-----------------------------------------------------------------------------------------------------------------------------------------------------------------------------------------------------------------------------------------------------------------------------------------------------------------------------------------------------------------------------|
| ARN-509-001     | MFS                                                          | Time from randomization to new metastatic lesions on CT/MRI by modified RECIST or on bone scan, or death from any cause                                                                                                                                                                                                                                                     |
|                 | 12-week PSA response                                         | Percent change in PSA at 12 weeks and maximal change at any time by PCWG2                                                                                                                                                                                                                                                                                                   |
|                 | Time to PSA progression                                      | Time from randomization to PSA progression by PCWG2                                                                                                                                                                                                                                                                                                                         |
| SPARTAN         | MFS                                                          | Time from randomization to first evidence of radiographically detectable bone or soft tissue distant metastasis or death from any cause                                                                                                                                                                                                                                     |
|                 | OS                                                           | Time from randomization to death from any cause                                                                                                                                                                                                                                                                                                                             |
|                 | Time to metastasis                                           | Time from randomization to first evidence of radiographically detectable bone or soft tissue distant metastasis                                                                                                                                                                                                                                                             |
|                 | PFS                                                          | Time from randomization to first documentation of radiographic progressive disease based on RECIST 1.1, or death from any cause                                                                                                                                                                                                                                             |
|                 | Time to symptomatic progression                              | Time from randomization to a skeletal-related event, pain progression, or worsening of disease-related symptoms leading to the initiation of a new systemic anticancer therapy or the time to the development of clinically significant symptoms due to local or regional tumor progression leading to surgery or radiation therapy                                         |
|                 | Time to initiation of cytotoxic chemotherapy                 | Time from randomization to the initiation of cytotoxic chemotherapy                                                                                                                                                                                                                                                                                                         |
|                 | Time to PSA progression                                      | Time from randomization to PSA progression by PCWG2 criteria                                                                                                                                                                                                                                                                                                                |
|                 | PSA response rate                                            | Percent of patients who achieved a 50% or greater reduction in PSA                                                                                                                                                                                                                                                                                                          |
|                 | Secondary PFS                                                | Time from randomization to investigator-assessed disease progression (by PSA, metastatic disease on imaging, or symptomatic, or any combination thereof) during the first subsequent treatment of mCRPC, or death                                                                                                                                                           |
|                 | QoL                                                          | Assessed with FACT-P and EQ-5D-3L                                                                                                                                                                                                                                                                                                                                           |
| PROSPER         | MFS                                                          | Time from randomization to radiographic progression or death. Assessment of bone disease will be done by bone scan. Radiographic progression for bone disease is defined as the appearance of one or more metastatic lesion on bone. Assessment of soft tissue disease will be done by CT or MRI. Radiographic progression for soft tissue disease is defined by RECIST 1.1 |
|                 | OS                                                           | Time from randomization to death from any cause                                                                                                                                                                                                                                                                                                                             |
|                 | Time to PSA progression                                      | Time from randomization to PSA progression by PCWG2                                                                                                                                                                                                                                                                                                                         |
|                 | PSA response rate                                            | Percent of patients who achieved a 50% or greater reduction in PSA                                                                                                                                                                                                                                                                                                          |
|                 | Time to the first use of a subsequent antineoplastic therapy | Time from randomization to the first use of new antineoplastic therapy for prostate cancer                                                                                                                                                                                                                                                                                  |
|                 | QoL                                                          | Assessed by the EQ-5D-5L and EORTC-QLQ-PR25                                                                                                                                                                                                                                                                                                                                 |
| STRIVE          | MFS (named as rPFS in STRIVE)                                | Time from randomization to first evidence of radiographic progression or death from any cause. For M0 patients, appearance of a metastasis is considered radiographic progression.                                                                                                                                                                                          |
|                 | PFS                                                          | Time from randomization to the earliest evidence of PSA progression by PCWG2, radiographic progression, or death from any cause                                                                                                                                                                                                                                             |
|                 | Time to PSA progression                                      | Time from randomization to PSA progression by PCWG2 criteria                                                                                                                                                                                                                                                                                                                |
|                 | PSA response rate                                            | Percentages of patients who achieved a 50% or greater, and 90% or greater reduction in PSA                                                                                                                                                                                                                                                                                  |
|                 | QoL                                                          | Assessed with FACT-P                                                                                                                                                                                                                                                                                                                                                        |
| ARAMIS          | MFS                                                          | Time from randomization to evidence of metastasis by CT/MRI or bone scan, or death from any cause. Metastasis in bone is defined as appearance of 1 or more lesions. Metastasis in soft tissue is defined as the appearance of an abnormal lymph node (i.e. $\geq 2$ cm in the short axis) or of any new visceral lesion(s) on CT/MRI                                       |
|                 | OS                                                           | Time from randomization to death from any cause                                                                                                                                                                                                                                                                                                                             |
|                 | Time to pain progression                                     | Time from randomization to an increase of $\geq 2$ points from baseline in the score assessed with the BPI-SF questionnaire or initiation of opioid treatment for cancer pain                                                                                                                                                                                               |
|                 | Time to first symptomatic skeletal event                     | Time from randomization to external-beam radiation therapy to relieve skeletal symptoms, new symptomatic pathologic bone fracture, occurrence of spinal cord compression, or tumor-related orthopedic surgical intervention                                                                                                                                                 |
|                 | Time to first cytotoxic chemotherapy                         | Time from randomization to first cytotoxic chemotherapy                                                                                                                                                                                                                                                                                                                     |
|                 | PFS                                                          | Time from randomization to evidence of any radiographic disease progression, including local relapse or new pathologic lymph nodes, or death from any cause                                                                                                                                                                                                                 |
|                 | Time to first prostate cancer-related invasive procedure     | Time from randomization to any procedure needed for alleviation of symptoms, signs or findings caused by progression of prostate cancer                                                                                                                                                                                                                                     |
|                 | Time to initiation of subsequent antineoplastic therapy      | Time from randomization to initiation of first antineoplastic therapy                                                                                                                                                                                                                                                                                                       |
|                 | Time to PSA progression                                      | Time from randomization to PSA progression by PCWG2 criteria                                                                                                                                                                                                                                                                                                                |
|                 | PSA response rate                                            | Percent of patients who achieved a 50% or greater reduction in PSA                                                                                                                                                                                                                                                                                                          |

| <b>Trial ID</b> | <b>Outcome</b>                                                                                                                                                            | <b>Outcome definition</b>                                                                                                                                                                                                                           |
|-----------------|---------------------------------------------------------------------------------------------------------------------------------------------------------------------------|-----------------------------------------------------------------------------------------------------------------------------------------------------------------------------------------------------------------------------------------------------|
|                 | Deterioration in ECOG performance status                                                                                                                                  | Percent of patients with an increase to a score of 3 or higher                                                                                                                                                                                      |
|                 | QoL                                                                                                                                                                       | Assessed with FACT-P, EQ-5D-3L, and EORTC-QLQ-PR25                                                                                                                                                                                                  |
| IMAAGEN         | MFS (reported as time to radiographic evidence of disease progression in IMAAGEN; with available individual patient level data including time to death, we estimated MFS) | Time from randomization to first scan (bone scan or CT/MRI) showing disease progression according to the modified RECIST 1.1                                                                                                                        |
|                 | PSA response rate                                                                                                                                                         | Percentages of patients who achieved a 30% or greater, 50% or greater, and 90% or greater reduction in PSA by the end of cycle 6 (28-day treatment cycle); percent of patients who achieved a 50% or greater reduction in PSA by the end of cycle 3 |
|                 | Time PSA progression                                                                                                                                                      | Time from randomization to PSA progression by PCWG2                                                                                                                                                                                                 |

<sup>a</sup>CT=computed tomography. ECOG=Eastern Cooperative Oncology Group. EORTC-QLQ-PR25=European Organization for the Research and Treatment of Cancer Quality of Life Questionnaire-Prostate Cancer Module. EQ-5D-3L=Three -level version of European Quality of Life-5 Dimensions. EQ-5D-5L=Five -level version of European Quality of Life-5 Dimensions. FACT-P=Functional Assessment of Cancer Therapy-Prostate. mCRPC=metastatic castration-resistant prostate cancer. MRI=magnetic resonance imaging. OS=overall survival. MFS=metastasis-free survival. PFS=progression-free survival. PCWG=Prostate Cancer Working Group. PSA=prostate-specific antigen. rPFS=radiographic progression-free survival. QoL=quality of life. RECIST=Response Evaluation Criteria in Solid Tumors.

**Supplementary Table 3. Baseline Characteristics of Nonmetastatic Castration-resistant Patients in Trials Included in Network Meta-analysis<sup>a</sup>**

| Trial ID                    | Treatment                        | Age (yr), median (range) | Time from initial diagnosis (yr), median (range) | ECOG, score (%)           | Gleason score, score (%)           | PSA (ng/ml), median (range) | PSADT (mo), median (range) |
|-----------------------------|----------------------------------|--------------------------|--------------------------------------------------|---------------------------|------------------------------------|-----------------------------|----------------------------|
| SPARTAN                     | Apalutamide                      | 74 (48-94)               | 8.0 (0.3-30.4)                                   | 0 (77)<br>1 (23)          | ≤7 (57)<br>>7 (43)                 | 7.8 (0.1-294.8)             | 4.4 (0.8-10.0)             |
|                             | Placebo                          | 74 (52-97)               | 7.9 (0.8-26.3)                                   | 0 (78)<br>1 (22)          | ≤7 (56)<br>>7 (44)                 | 8.0 (1.1-291.8)             | 4.5 (0.7-10.0)             |
| PROSPER                     | Enzalutamide                     | 74 (50-95)               | 7.5 (0.2-31.8)                                   | 0 (80)<br>1 (20)          | ≤7 (55)<br>>7 (41)<br>Missing (4)  | 11.1 (0.8-1071.1)           | 3.8 (0.4-37.4)             |
|                             | Placebo                          | 73 (53-92)               | 7.2 (0.2-23.0)                                   | 0 (82)<br>1 (18)          | ≤7 (52)<br>>7 (44)<br>Missing (4)  | 10.2 (0.2-457.5)            | 3.6 (0.5-71.8)             |
| STRIVE (nmCRPC PSADT≤10 mo) | Enzalutamide                     | 75 (50-89)               | 7.9 (1.0-33.4)                                   | 0 (82)<br>1 (18)          | ≤7 (47)<br>>7 (37)<br>Missing (16) | 7.3 (1.8-83.7)              | 3.5 (0.6-9.8)              |
|                             | Bicalutamide                     | 78 (58-89)               | 8.1 (0.7-17.7)                                   | 0 (78)<br>1 (22)          | ≤7 (52)<br>>7 (36)<br>Missing (12) | 6.5 (2.3-58.6)              | 4.5 (0.5-9.5)              |
| ARAMIS                      | Darolutamide                     | 74 (48-95)               | 7.2 (0.2-28.1)                                   | 0 (68)<br>1 (32)          | ≤7 (74)<br>>7 (23)<br>Missing (3)  | 9.0 (0.3-858.3)             | 4.4 (0.7-11.0)             |
|                             | Placebo                          | 74 (50-92)               | 7.0 (0.0-28.7)                                   | 0 (71)<br>1 (29)          | ≤7 (71)<br>>7 (26)<br>Missing (3)  | 9.7 (1.5-885.2)             | 4.7 (0.7-13.2)             |
| IMAAGEN                     | Abiraterone acetate + Prednisone | 72 (48-90)               | 10.2 (1.5-26.0)                                  | 0 (85)<br>1 (14)<br>2 (1) | ≤7 (61)<br>>7 (39)                 | 11.9 (1.3-167.8)            | 3.4 (1.1-9.4)              |

<sup>a</sup>We chose SPARTAN from among the included randomized controlled trials for matching-adjusted indirect comparison with IMAAGEN, because PROSPER and ARAMIS populations had much more widely spread PSA and (or) PSADT than IMAAGEN population, which cannot be well balanced by reweighting. And the sample size of STRIVE trial (N=112) is much smaller than that of SPARTAN trial (N=1,207) for precise relative effect estimation.

ECOG=Eastern Cooperative Oncology Group. nmCRPC=nonmetastatic castration resistant prostate cancer. PSA=prostate-specific antigen. PSADT=PSA doubling time.



**Supplementary Table 4. Relative Effect Estimates for All Possible Pairwise Treatment Comparisons**

| Outcome, treatment effect (95% CrI <sup>a</sup> ) | Comparator          | Intervention        |                  |                  |                  |                     |         |
|---------------------------------------------------|---------------------|---------------------|------------------|------------------|------------------|---------------------|---------|
|                                                   |                     | Abiraterone acetate | Apalutamide      | Enzalutamide     | Darolutamide     | Bicalutamide        | Placebo |
| Metastasis-free survival, hazard ratio            | Apalutamide         | 0.79 (0.41-1.50)    | Apalutamide      |                  |                  |                     |         |
|                                                   | Enzalutamide        | 0.74 (0.39-1.40)    | 0.93 (0.71-1.22) | Enzalutamide     |                  |                     |         |
|                                                   | Darolutamide        | 0.54 (0.28-1.02)    | 0.68 (0.52-0.90) | 0.73 (0.56-0.95) | Darolutamide     |                     |         |
|                                                   | Bicalutamide        | 0.22 (0.08-0.63)    | 0.28 (0.12-0.68) | 0.30 (0.13-0.69) | 0.41 (0.17-0.98) | Bicalutamide        |         |
|                                                   | Placebo             | 0.22 (0.12-0.41)    | 0.28 (0.23-0.34) | 0.30 (0.25-0.36) | 0.41 (0.34-0.49) | 1.01 (0.43-2.38)    | Placebo |
| Overall survival, hazard ratio                    | Darolutamide        |                     |                  |                  |                  |                     |         |
|                                                   | Enzalutamide        | 0.95 (0.69-1.29)    | Enzalutamide     |                  |                  |                     |         |
|                                                   | Apalutamide         | 0.92 (0.64-1.31)    | 0.97 (0.72-1.31) | Apalutamide      |                  |                     |         |
|                                                   | Placebo             | 0.69 (0.53-0.89)    | 0.73 (0.61-0.87) | 0.75 (0.59-0.95) | Placebo          |                     |         |
| Serious adverse events, odds ratio                | Darolutamide        |                     |                  |                  |                  |                     |         |
|                                                   | Enzalutamide        | 0.92 (0.63-1.34)    | Enzalutamide     |                  |                  |                     |         |
|                                                   | Bicalutamide        | 0.81 (0.29-2.33)    | 0.88 (0.34-2.28) | Bicalutamide     |                  |                     |         |
|                                                   | Apalutamide         | 0.83 (0.58-1.19)    | 0.91 (0.62-1.32) | 1.03 (0.37-2.89) | Apalutamide      |                     |         |
|                                                   | Abiraterone acetate | 0.68 (0.39-1.19)    | 0.74 (0.42-1.31) | 0.84 (0.28-2.56) | 0.81 (0.47-1.43) | Abiraterone acetate |         |
|                                                   | Placebo             | 1.32 (1.02-1.70)    | 1.44 (1.08-1.89) | 1.63 (0.61-4.41) | 1.58 (1.23-2.03) | 1.94 (1.17-3.22)    | Placebo |

<sup>a</sup>CrI=credible interval.

## Supplementary Figure 1. Flowchart of Study Selection

### Bibliographic databases

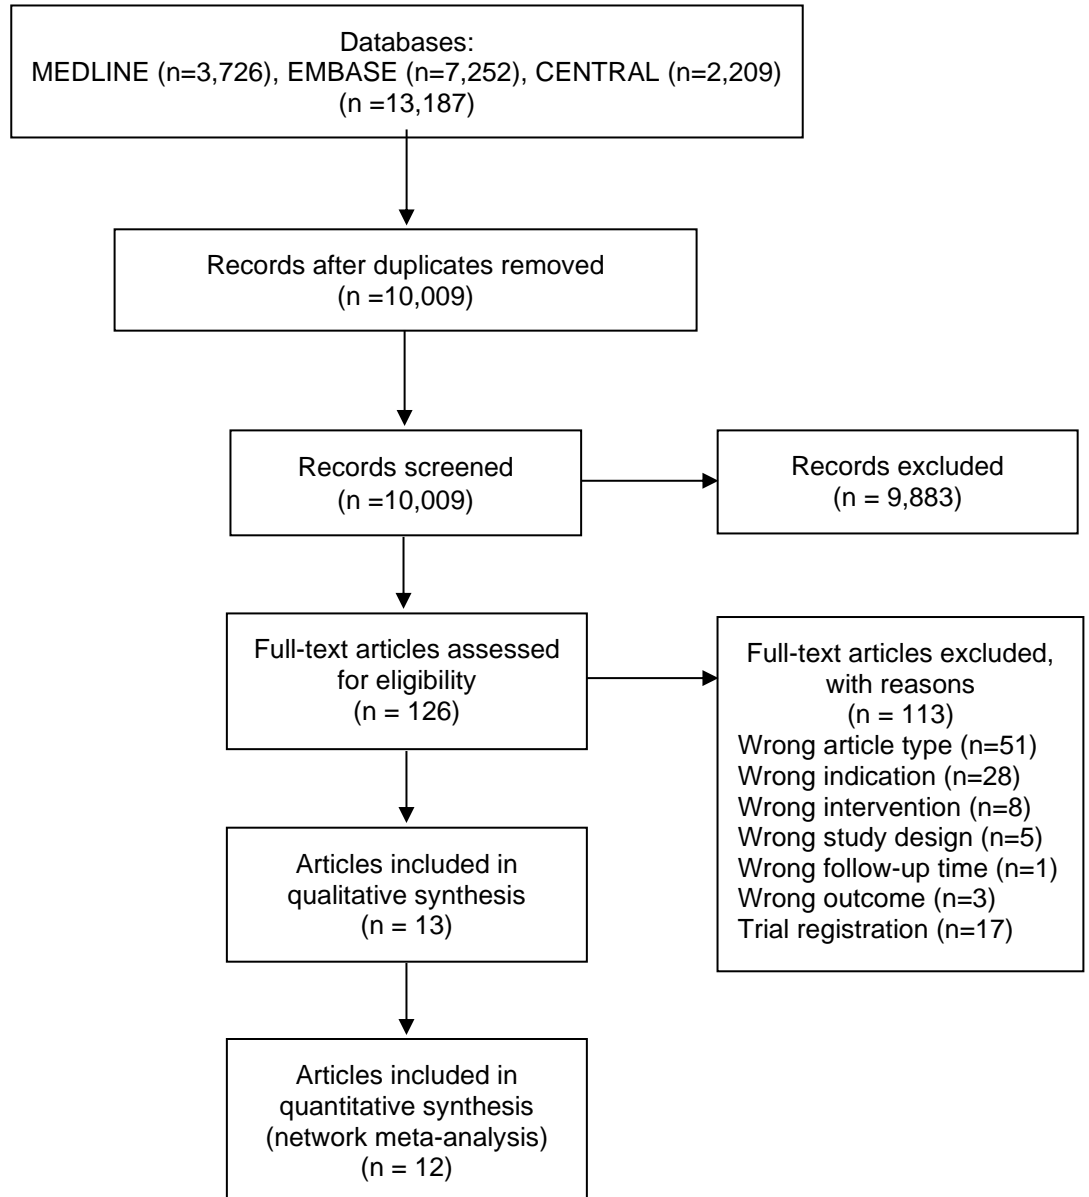

## Trial registries

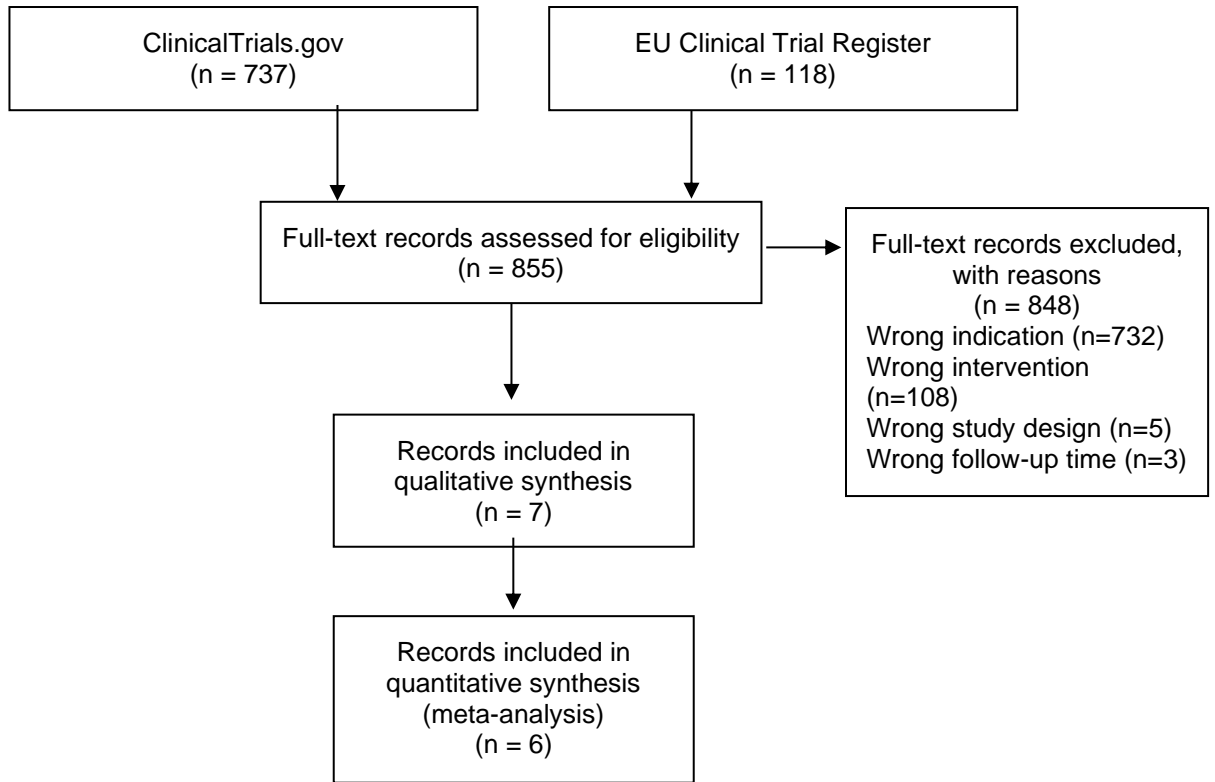

## Regulatory documents

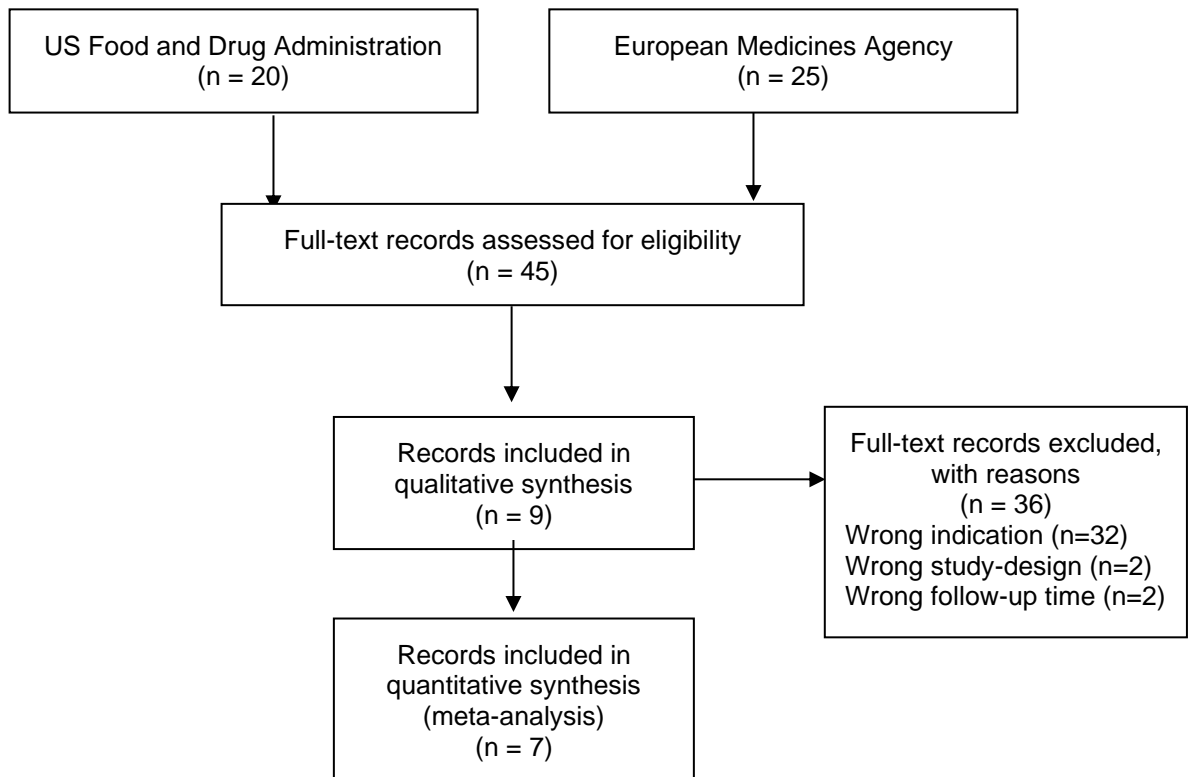

**Supplementary Figure 2. SUCRA over time derived from parametric survival network meta-analysis**

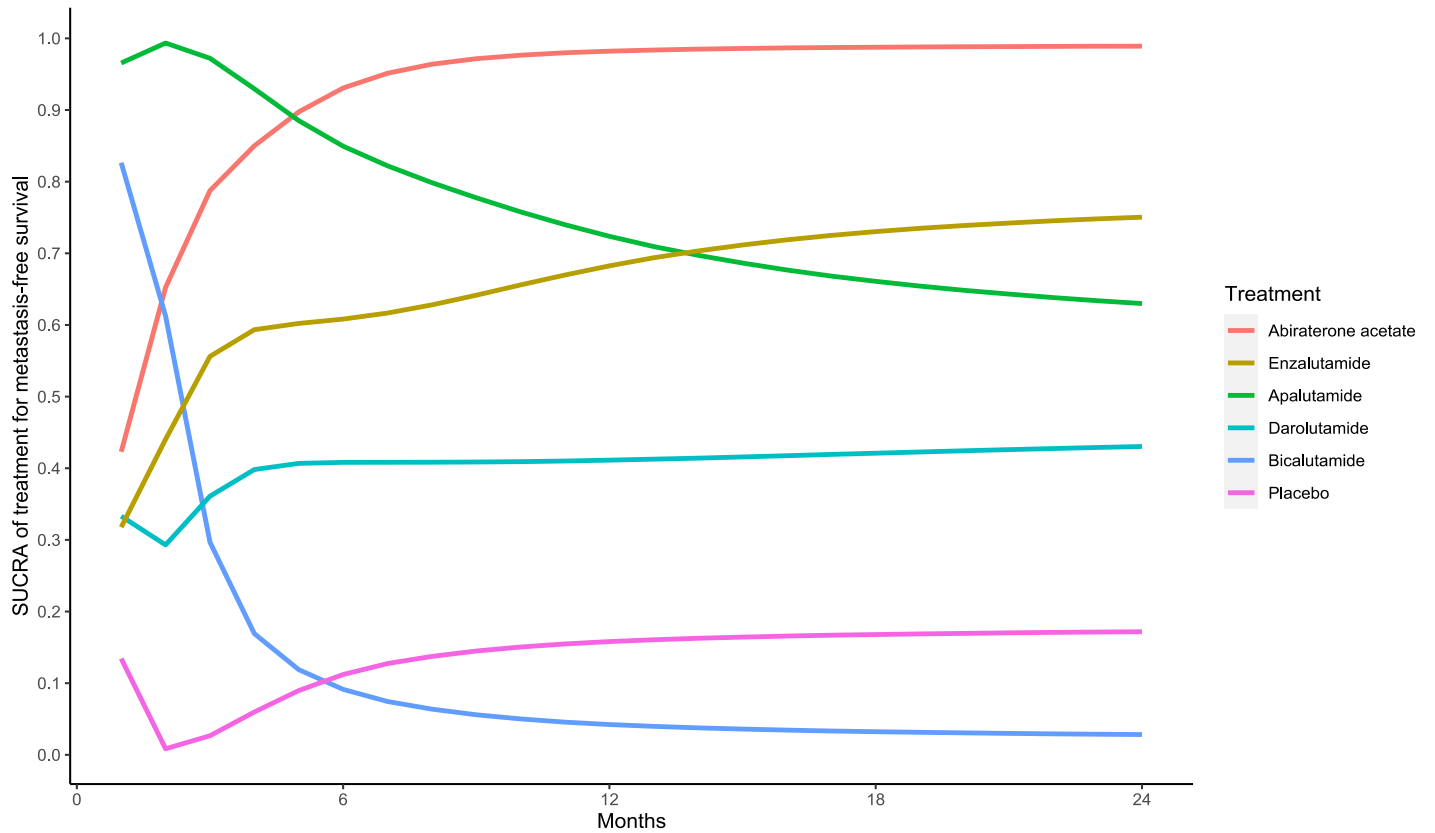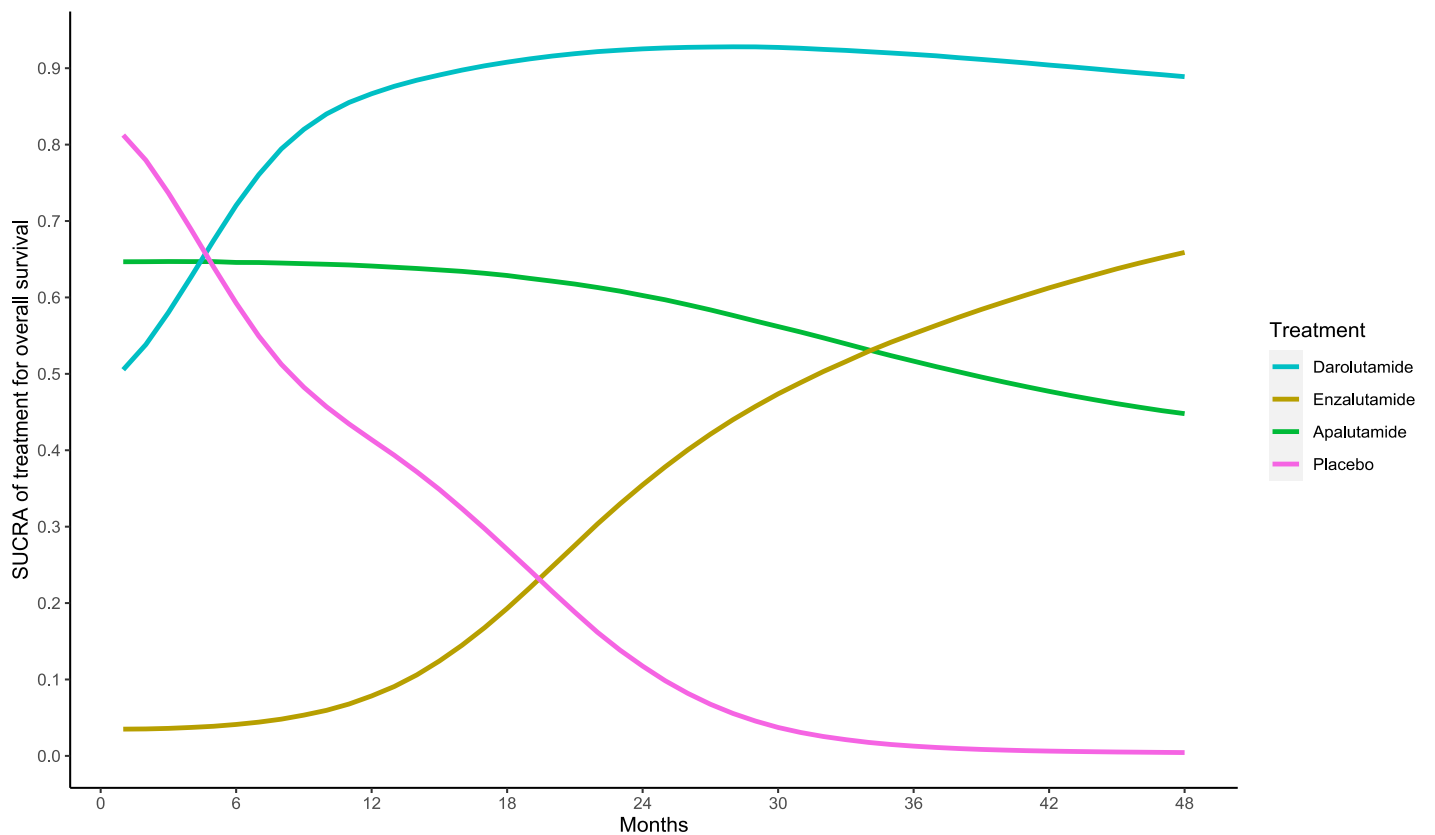

SUCRA=the surface under the cumulative ranking line (SUCRA). SUCRA was used to summarize treatment rankings. SUCRA ranges from 0 to 1. The closer SUCRA to 1, the higher the treatment rank.

**Supplementary Figure 3. Treatment Ranking Probabilities for Metastasis-free Survival, Overall Survival, and Serious Adverse Events**

**Metastasis-free survival**

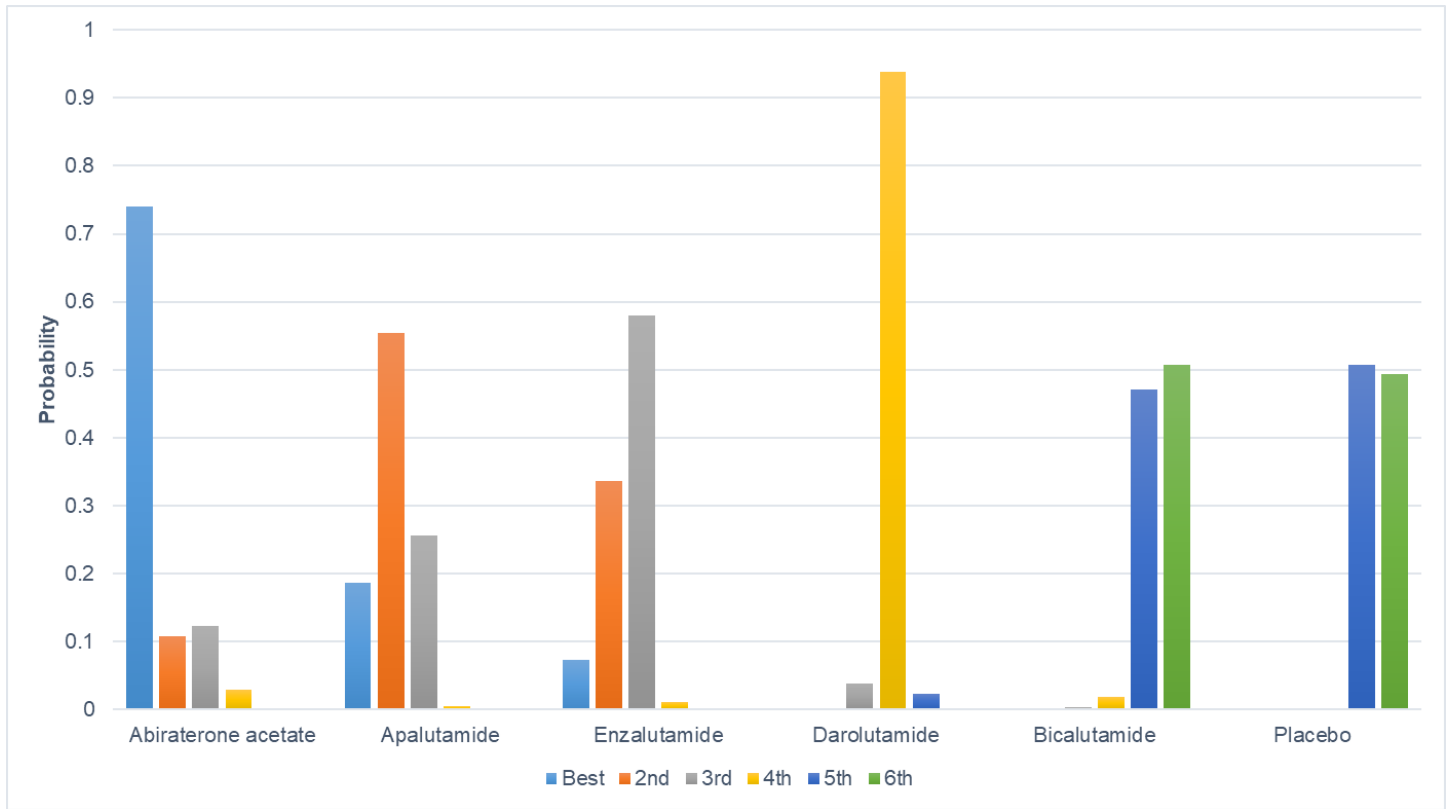

**Overall survival**

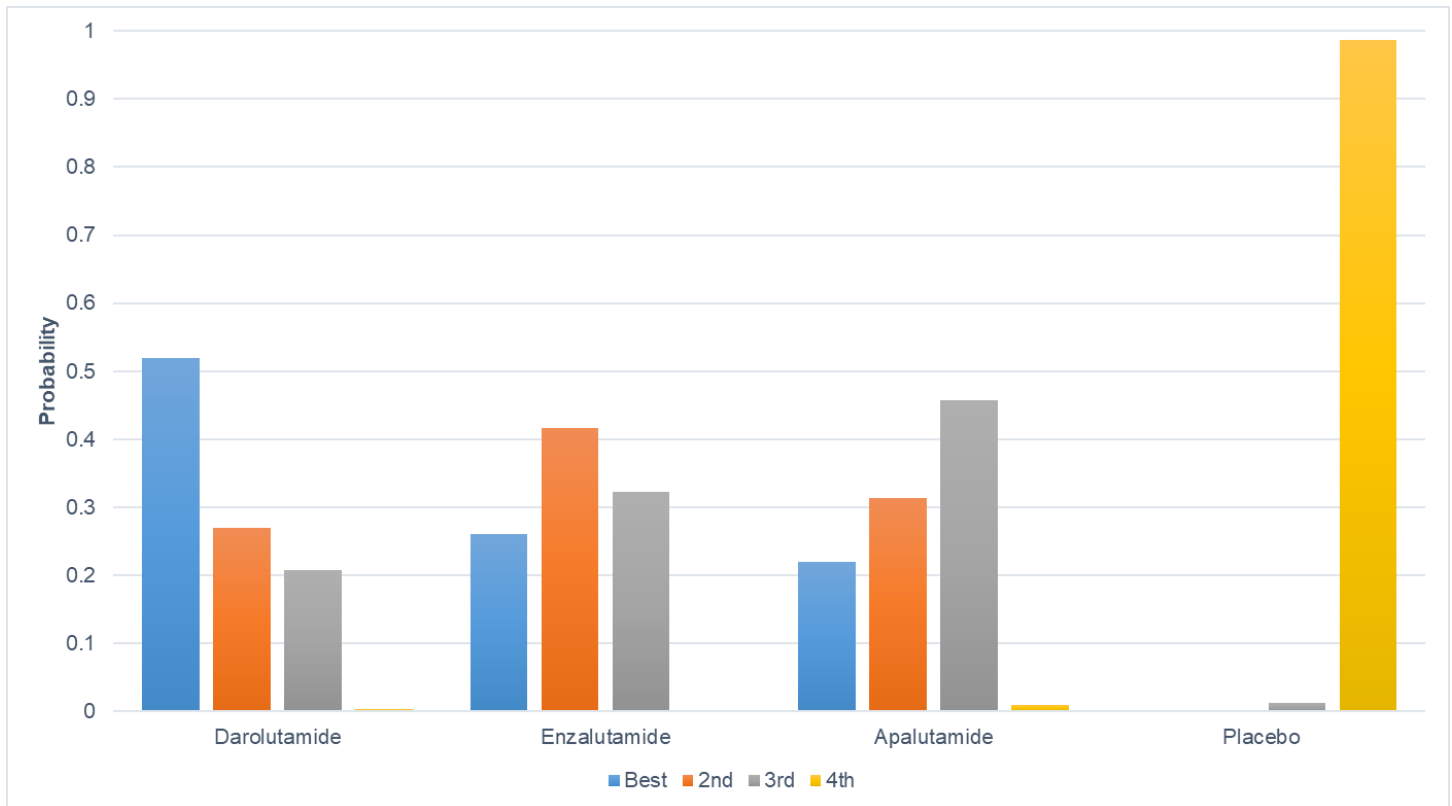

## Serious Adverse Events

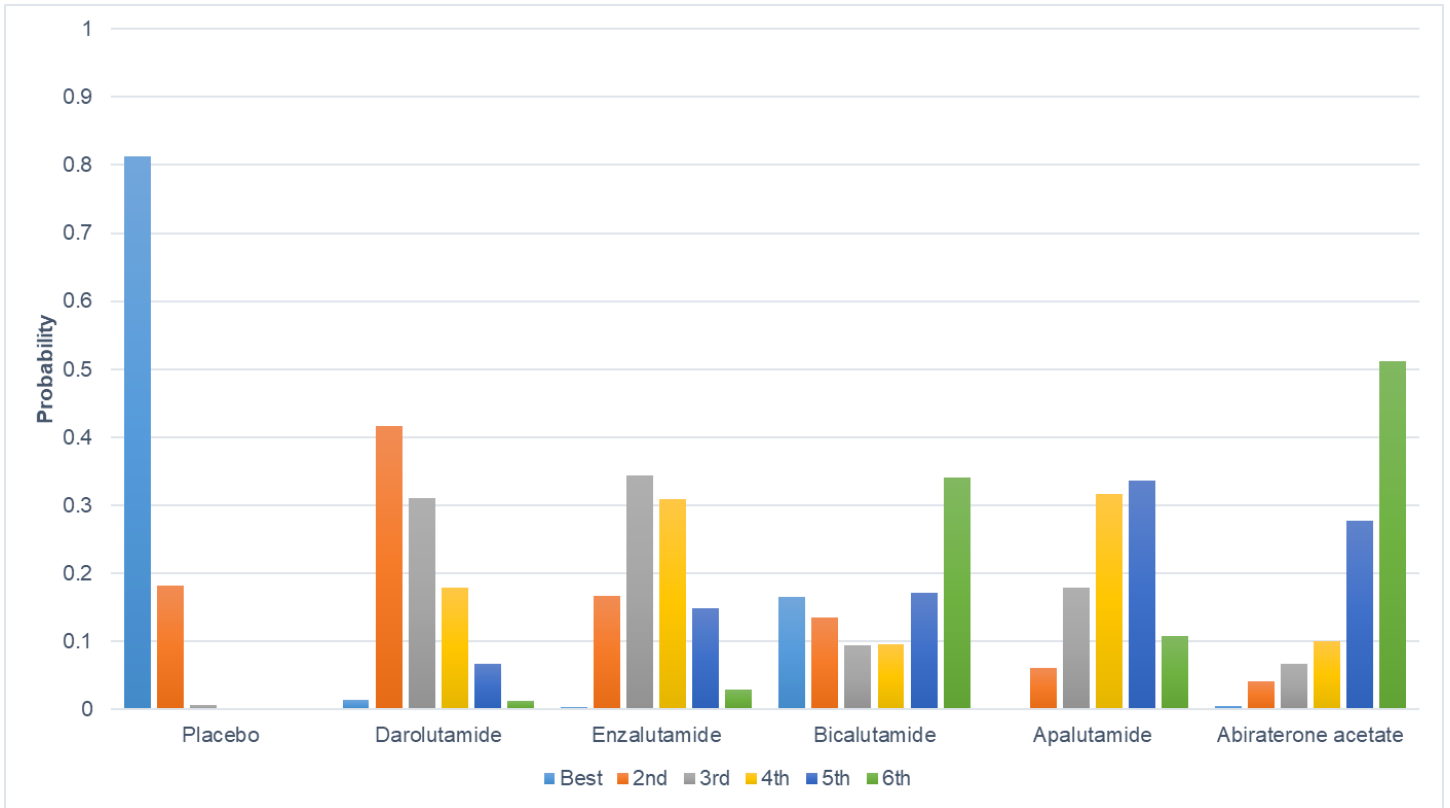

## References

1. Phillippo D, Ades A, Dias S, Palmer S, Abrams K, Welton N: NICE DSU Technical support document 18: Methods for population-adjusted indirect comparisons in submissions to NICE, 2016. <http://nicedsu.org.uk/technical-support-documents/population-adjusted-indirect-comparisons-maic-and-stc/>
2. Signorovitch JE, Wu EQ, Yu AP, et al: Comparative effectiveness without head-to-head trials: a method for matching-adjusted indirect comparisons applied to psoriasis treatment with adalimumab or etanercept. *Pharmacoeconomics* 28:935-45, 2010
3. The United States Food and Drug Administration. Code of Federal Regulations Title 21 Part 312 Sec. 312.32 IND safety reporting, 2019, <https://www.accessdata.fda.gov/scripts/cdrh/cfdocs/cfcr/cfrsearch.cfm?fr=312.32>
4. The United States Department of Health and Human Services National Cancer Institute. Common Terminology Criteria for Adverse Events (CTCAE) v5.0, 2017. [https://ctep.cancer.gov/protocolDevelopment/electronic\\_applications/ctc.htm](https://ctep.cancer.gov/protocolDevelopment/electronic_applications/ctc.htm)
